# Supplementary material for: A Global Overview of the Genetic and Functional Diversity in the Helicobacter pylori cag Pathogenicity Island
Source: PubMed Central journal article supplement (PMC2924317; doi:10.1371/journal.pgen.1001069), 2010-08-19

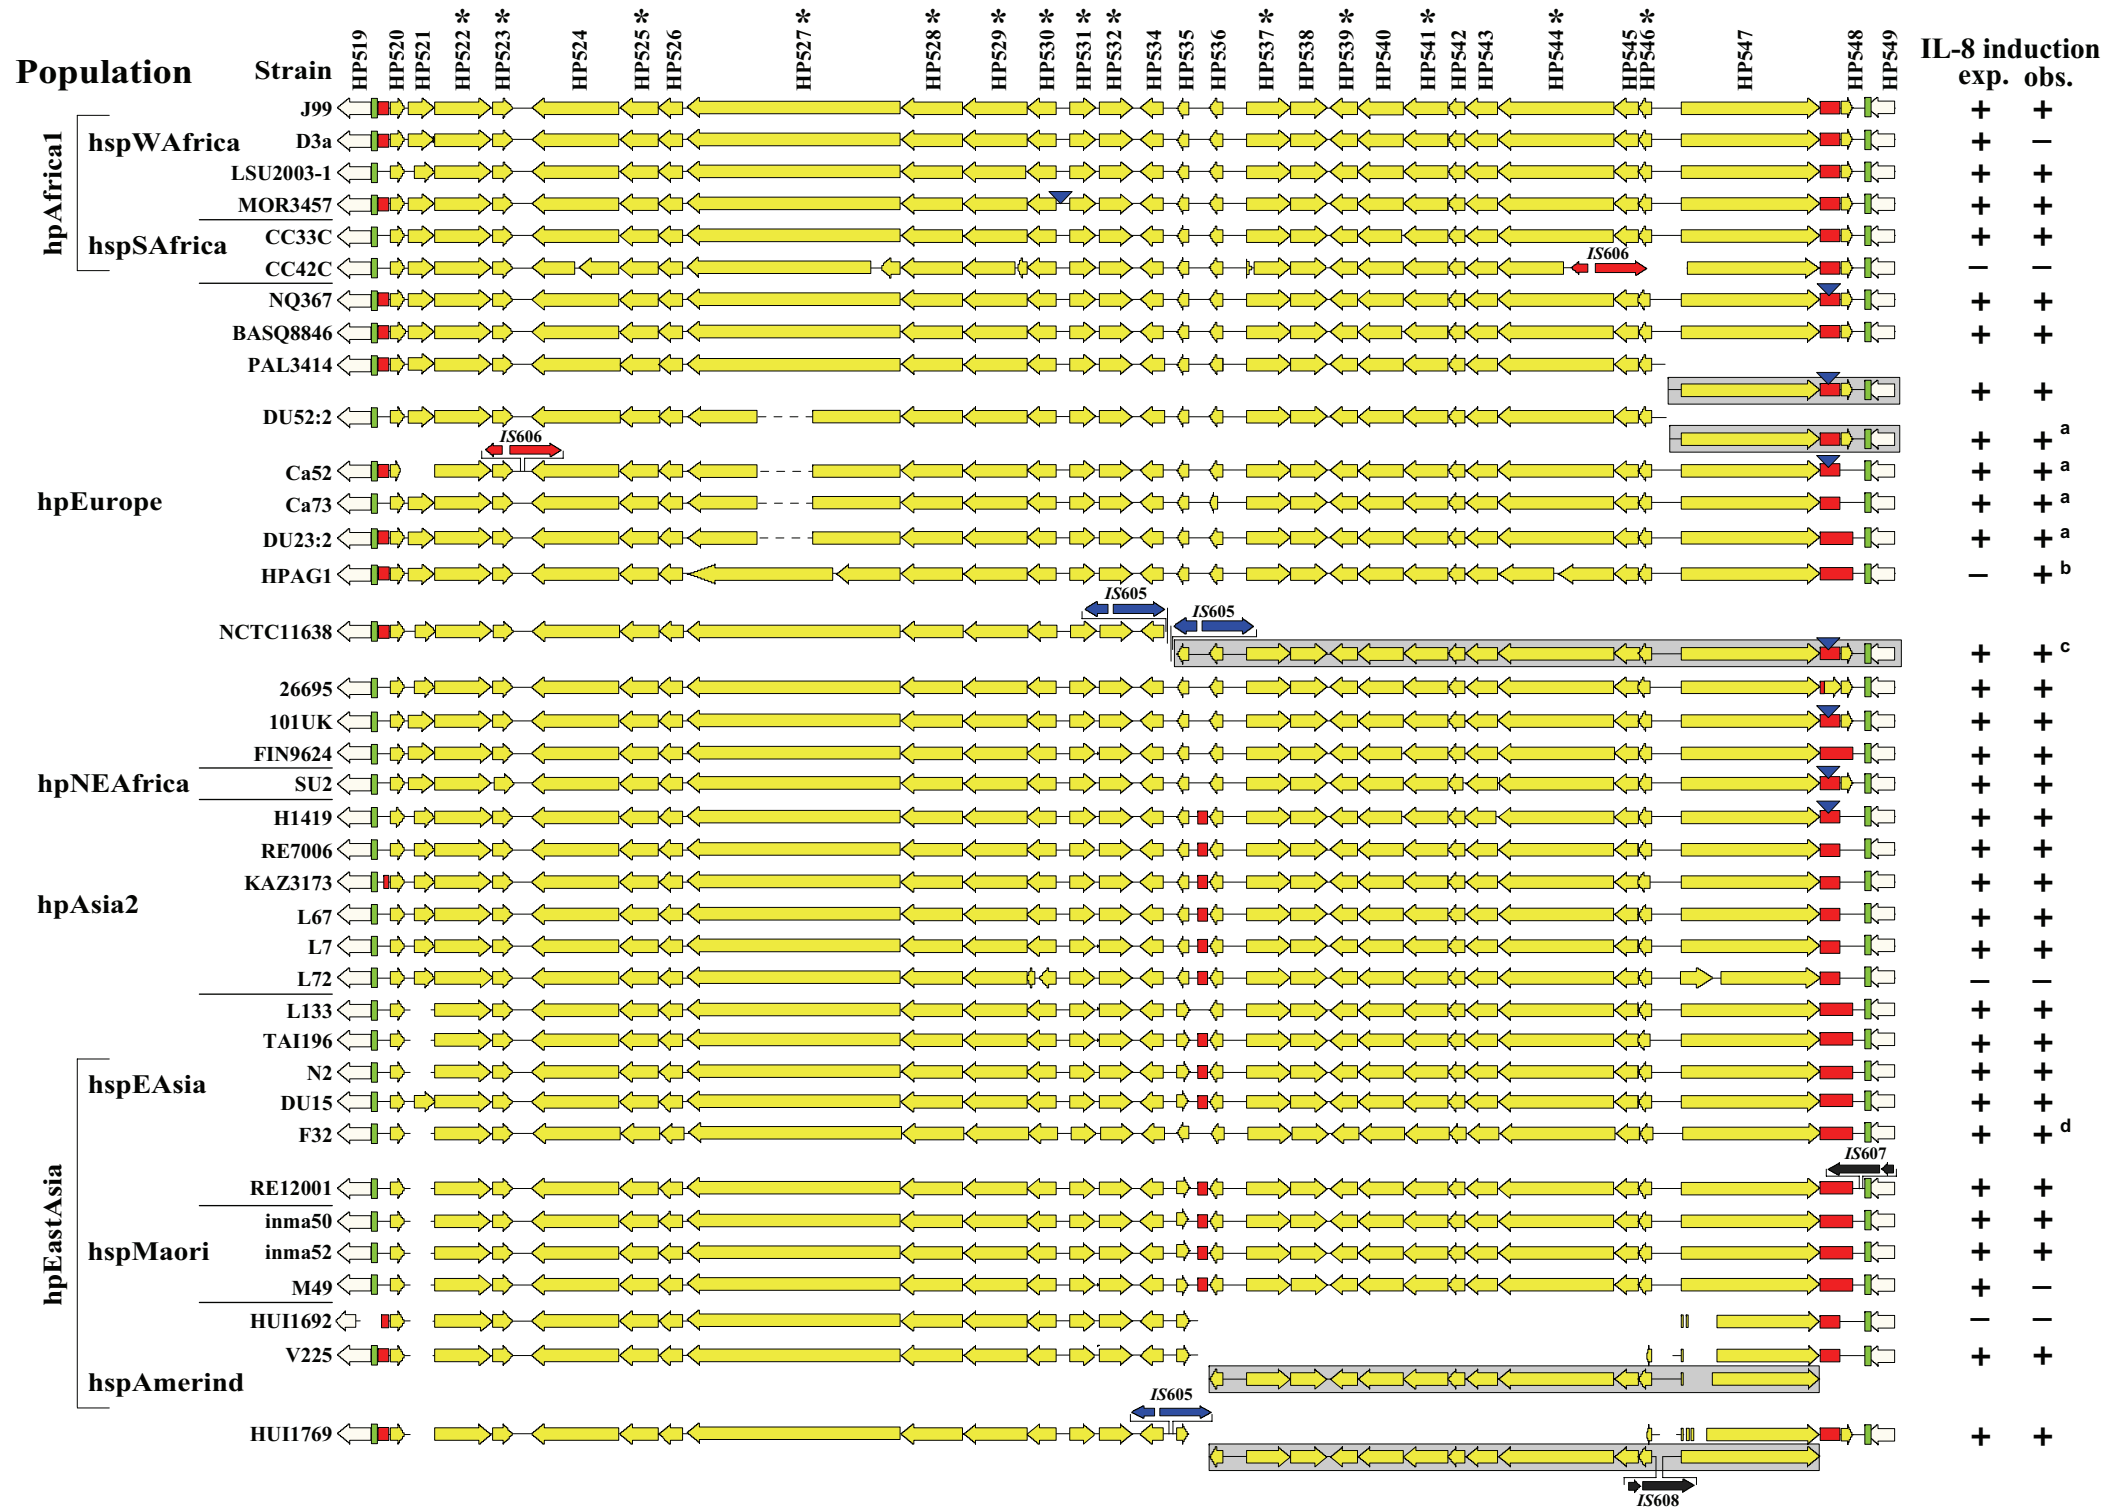

Supplement: pgen.1001069.s001.pdf [file pgen.1001069.s001.pdf]
